# Supplementary material for: Selective separation of 152Eu from a mixture of 152Eu and 137Cs using a chitosan based hydrogel
Source: Royal Society of Chemistry journal article supplement (doi:10.1039/c5ra14976b), 2015-01-01
Supplement: c5ra14976b1.pdf [file c5ra14976b1.pdf]

## Electronic Supplementary Information

### Selective Separation of $^{152}\text{Eu}$ from a Mixture of $^{152}\text{Eu}$ and $^{137}\text{Cs}$ Using Chitosan Based Hydrogel

Santu Maity<sup>a</sup>, Arpita Datta<sup>b</sup>, Susanta Lahiri<sup>b\*</sup> and Jhuma Ganguly<sup>a\*</sup>

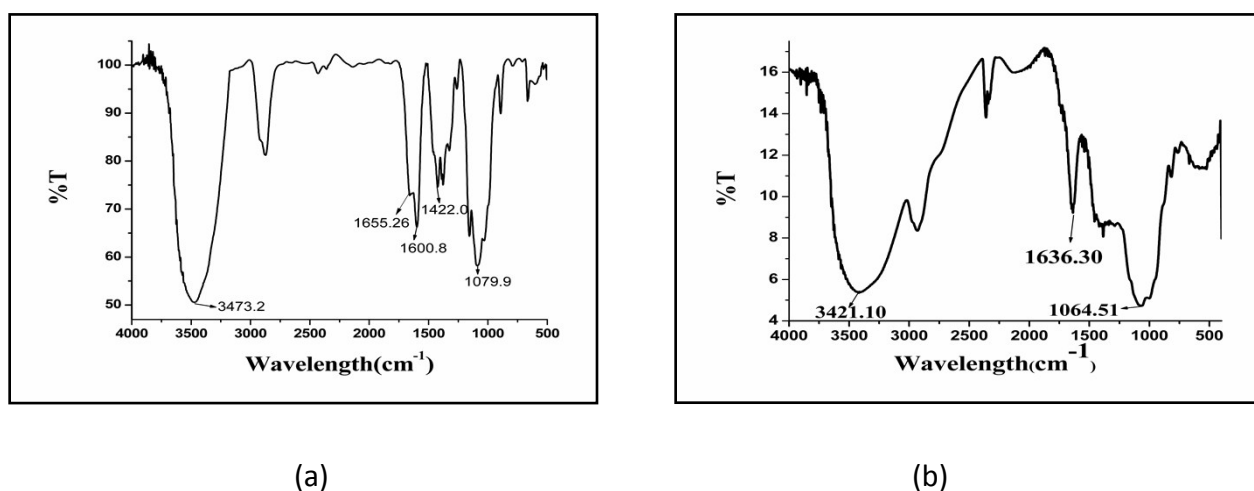

**Figure S1:** FT-IR spectra of (a) chitosan and (b) ChG .

| Sample   | $\nu_{\text{C=O}}$<br>(amide I) | $\delta_{\text{N-H}}$<br>(amide II) | $\nu_{\text{C=N}}$<br>(imine) | $\nu_{\text{(bridge C-O-C)}}$ |
|----------|---------------------------------|-------------------------------------|-------------------------------|-------------------------------|
| Chitosan | 1655.26                         | 1600.8                              | absent                        | 1079.9                        |
| ChG      | absent                          | absent                              | 1636.3                        | 1073.3                        |

**Table S1.** The most significant IR peaks ( $\text{cm}^{-1}$ ) of chitosan and the synthesized Schiff bases

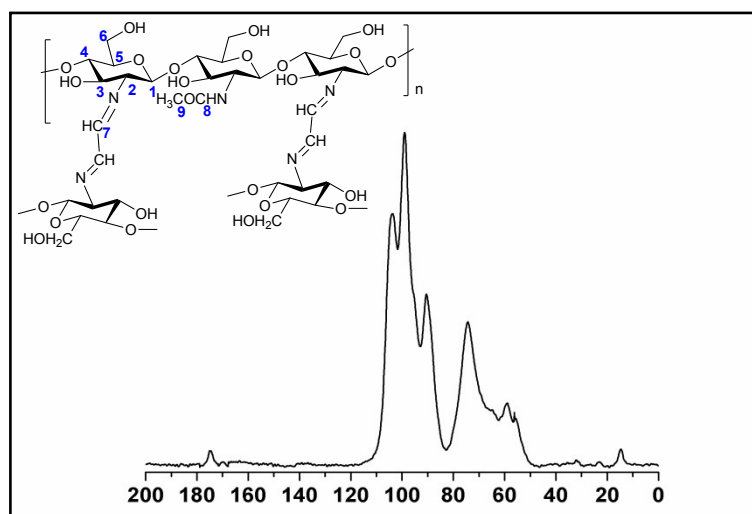

**Figure S2:**  $^{13}\text{C}$  CP-MAS NMR spectrum ChG

| $\text{C}_1$ | $\text{C}_{1'}$ | $\text{C}_2$ | $\text{C}_3$ | $\text{C}_4$ | $\text{C}_5$ | $\text{C}_6$ | $\text{C}_7$ | $\text{C}_8$ | $\text{C}_9$ |
|--------------|-----------------|--------------|--------------|--------------|--------------|--------------|--------------|--------------|--------------|
| 104.04       | 98.93           | 56.14        | 74.57        | 90.74        | 74.57        | 59.10        | 170.67       | 174.65       | 14.90        |

**Table S2.** The chemical shifts ( $\delta$ , ppm) in  $^{13}\text{C}$  CP-MAS NMR spectrum of ChG

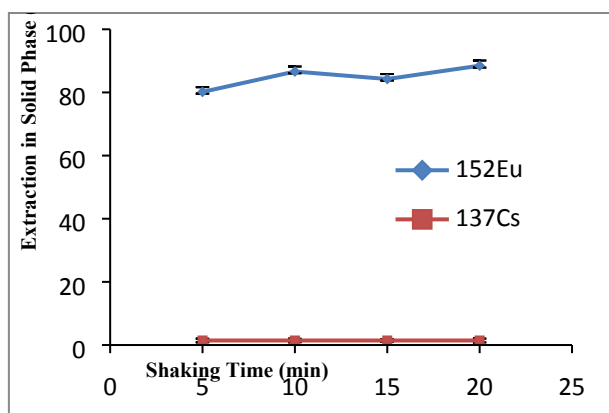

(a)

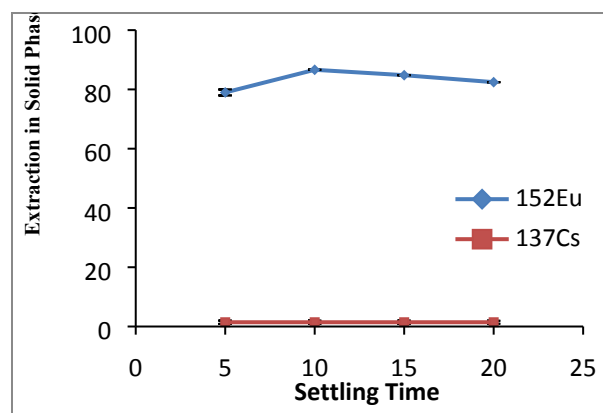

(b)

**Figure S4:** SLX profile of  $^{152}\text{Eu}$  and  $^{137}\text{Cs}$  in solid phase (hydrogel) by varying (a) shaking time and (b) settling of the medium

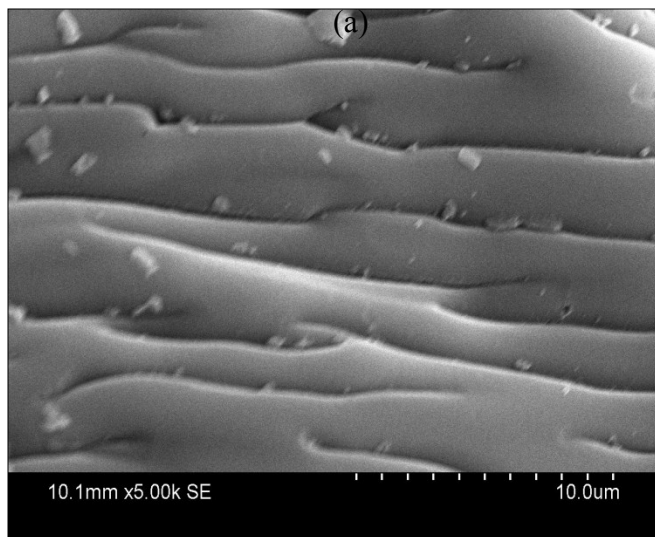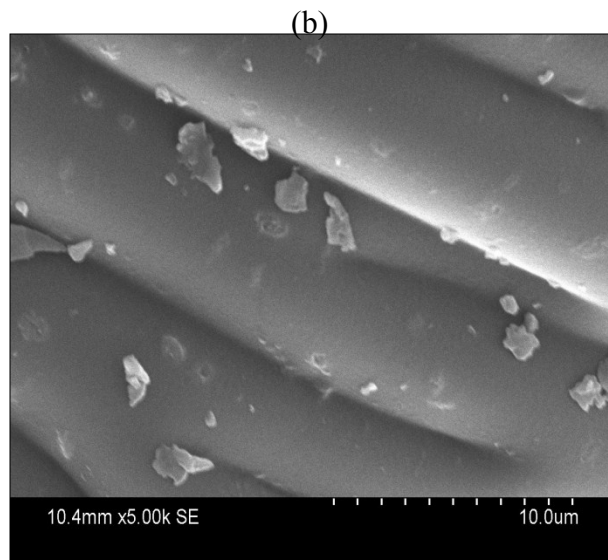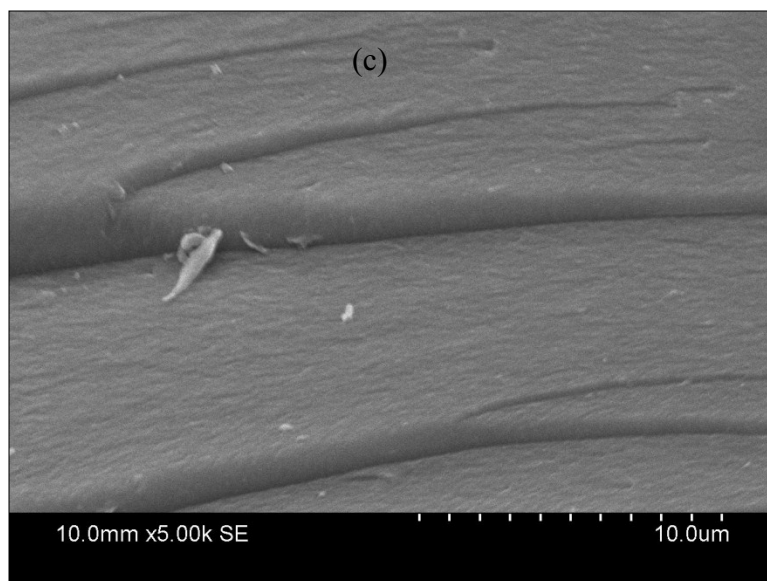

**Figure S5:** Morphological Study of ChG after gamma irradiation (a) 1 kGy, (b) 4 kGy and (c) 8 kGy.
